# Supplementary material
Source: PubMed Central journal article supplement (PMC3129180)
Supplement: supp_M111.220491_jbc.M111.220491-1.pdf [file supp_M111.220491_jbc.M111.220491-1.pdf]

**Table S1.** Primer sequences used for gene identification, synthesis of complete coding sequence and for shRNA gene silencing

| Mouse gene                                                                                    | Gene ID     | Primer Sequence                                                                   | Product size (bp) |
|-----------------------------------------------------------------------------------------------|-------------|-----------------------------------------------------------------------------------|-------------------|
| <b>Primer sequences used for gene identification in the Quantitative-PCR method</b>           |             |                                                                                   |                   |
| <i>Chemerin</i>                                                                               | NM_027852   | Fw TACAGGTGGCTCTGGAGGAGTTC<br>Rv CTTCTCCCGTTTGGTTGATTG                            | 195 bp            |
| <i>CMKLR1</i>                                                                                 | NM_008153   | Fw CGAGTTCTCAAACCCTGAAGTCGC<br>Rv CAAGTCCACAAAGTAGCCAAAGCC                        | 222 bp            |
| <i>PPAR<math>\gamma</math></i>                                                                | NM_011146   | Fw TCGCTGATGCACTGCCTATG<br>Rv GAGAGGTCCACAGAGCTGATT                               | 102 bp            |
| <i>CD36</i>                                                                                   | NM_007643   | Fw GAACCACTGCTTCAAAAAGTGG<br>Rv GTCCTGAGTTATATTTTCCTTGG                           | 178 bp            |
| <i>Adiponectin</i>                                                                            | NM_009605   | Fw AGCCGCTTATATGTATCGCTCA<br>Rv TGCCGTCATAATGATTCTGTTGG                           | 118 bp            |
| <i>ccna2</i>                                                                                  | NM_009828.2 | Fw ACATTCACACGTACCTTAGGGA<br>Rv CATAGCAGCCGTGCCTACA                               | 242 bp            |
| <i>ccnb2</i>                                                                                  | NM_007630.2 | Fw GCCAAGAGCCATGTGACTATC<br>Rv CAGAGCTGGTACTTTGGTGTTT                             | 114 bp            |
| <i>ccnd2</i>                                                                                  | NM_009829.3 | Fw TGTGGATTGTCTCAAAGCCTG<br>Rv CAACATCCCGCACGTCTGTA                               | 149 bp            |
| <i>CyclophilinA</i>                                                                           | X52803      | Fw GAGCTGTTTGACAGACAAAGTTC<br>Rv CCCTGGCACATGAATCCTGG                             | 124 bp            |
| <b>Primer sequences used in the synthesis of cDNA for the generation of expression vector</b> |             |                                                                                   |                   |
| <i>Chemerin</i>                                                                               | NM_027852   | Fw AAAAGGATCCGACTGAGGTGAAGCCATGAAGTGC<br>Rv AAAAGAATTCTTATTTGGTTCTCAGGGCCCTGGAGAA |                   |
| <i>CMKLR1</i>                                                                                 | NM_008153   | Fw AAAAGGATCCGAGATGGAGTACGACGCTTACAAC<br>Rv AAAATCTAGATTCCCAGGTGAGGTTTCAGAGGG     |                   |
| <i>PPAR<math>\gamma</math></i>                                                                | NM_011146   | Fw AAAAGGTACCTATGCTGTTATGGGTGAAACTCTGG<br>Rv AAAACTCGAGCCTGCTAATACAAGTCCTTGTAGATC |                   |
| <b>Oligonucleotide sequences used for shRNA gene silencing</b>                                |             |                                                                                   |                   |
| <i>Chemerin</i>                                                                               | NM_027852   | GGAGTTGCAATGCATTAAGAT                                                             |                   |
| <i>CMKLR1</i>                                                                                 | NM_008153   | GGAAGATAACCTGCTTCAACA                                                             |                   |
| <i>PPAR<math>\gamma</math></i>                                                                | NM_011146   | GCCCTTACCACAGTTGATTT                                                              |                   |

Fw, Forward; Rv, reverse; Restriction sites used for cloning are underlined.

**Table S2.** Primer sequences used for chemerin promoter analysis and chromatin immunoprecipitation (ChIP)

| Primer                                                                                                                                               | Position    | Primer Sequence                                          |
|------------------------------------------------------------------------------------------------------------------------------------------------------|-------------|----------------------------------------------------------|
| <b>Primer sequences used for generating chemerin promoter constructs, -4459/+38 and -600/+38</b>                                                     |             |                                                          |
| Chem(-4459/+38)-Fw                                                                                                                                   | -4459/-4435 | AAAA <u>ACGCGT</u> ACATGAGTAAACCACCATTGCTTGC             |
| Chem(-600/+38)-Fw                                                                                                                                    | -600/-578   | AAAA <u>ACGCGT</u> GACTGATGCCAGCCAGTCAAAGC               |
| Chem-Rv                                                                                                                                              | +16/+38     | AAAA <u>CTCGAG</u> CTCCTCTCTCTTGGTCCCCAAAG               |
| <b>Primer sequences used for generating direct repeat 1 (DR1) constructs, pDR1 (-61/-49) and dDR1 (-472/-460)</b>                                    |             |                                                          |
| pDR1-Fw                                                                                                                                              | -125/-104   | AAAA <u>CTCGAG</u> GTCTCATTGGTGCTCCAGGC                  |
| pDR1-Rv                                                                                                                                              | -12/+9      | AAAA <u>AGATCT</u> CCTTTTCCCACTGACCTTCTC                 |
| dDR1-Fw                                                                                                                                              | -566/-546   | AAAA <u>CTCGAG</u> GGCTGTGAACAAACCCGAGAC                 |
| dDR1-Rv                                                                                                                                              | -394/-371   | AAAA <u>AGATCT</u> TGACCAGGTGATCTTCCACTAGAA              |
| <b>Primer sequences used for generating promoter constructs with mutations in the DR1 elements</b>                                                   |             |                                                          |
| ΔpDR1-Fw                                                                                                                                             |             | GCTCAATGCAAGAGGAG <u>GTAC</u> CGGGAACCTTGGGAAACAGAAACTC  |
| ΔpDR1-Rv                                                                                                                                             |             | GAGTTTTCTGTTTCCCAAAGTTCCCG <u>GTAC</u> CTCCTCTTGCATTGAGC |
| ΔdDR1-Fw                                                                                                                                             |             | GGAGCTCTCTCACTGGACACAC <u>GGTAC</u> CAACTGAAGCAACAGACC   |
| ΔdDR1-Rv                                                                                                                                             |             | GGTCTGTTGCTTCAGTT <u>GGTAC</u> CGTGTGTCCAGTGAGAGAGCTCC   |
| <b>Primer sequences used for identifying the specific binding of chemerin promoter target sequences to PPAR<math>\gamma</math> in the CHIP assay</b> |             |                                                          |
| CHIP-target region-Fw                                                                                                                                | -138/-115   | TATTCAGCCTGCAGTCTCATTGG                                  |
| CHIP-target region-Rv                                                                                                                                | -35/-13     | CCAGAGTCCGGAGTTTGGAGTT                                   |
| CHIP-nontarget region-Fw                                                                                                                             | -3693/-3670 | AGAAGAACAGAGACCACGGGTATG                                 |
| CHIP-nontarget region-Rv                                                                                                                             | -3529/-3505 | GGACTTGAAGTGAAGAGAAATGGCAG                               |

Fw, Forward; Rv, reverse; Restriction sites used for cloning are underlined.
